# Supplementary material for: The differentially regulated genes TvQR1 and TvPirin of the parasitic plant Triphysaria exhibit distinctive natural allelic diversity
Source: PubMed Central journal article supplement (PMC3599707; doi:10.1186/1471-2229-13-28), 2013-02-18
Supplement: 1471-2229-13-28-S3.pdf [file 1471-2229-13-28-S3.pdf]

**Additional File 3. Discontinuous sequence identity between Accession JN606867 and clone TrVe61FuB1\_8246**

“Align Sequences Nucleotide BLAST” was performed with the default setting of blastn.

**Blast 2 sequences**

**TrVe61FuB1\_8246: Length -- 513 bp | protein...**

|                      |                                                                                                              |                       |                |
|----------------------|--------------------------------------------------------------------------------------------------------------|-----------------------|----------------|
| <b>Query ID</b>      | icl 56675                                                                                                    | <b>Subject ID</b>     | 56677          |
| <b>Description</b>   | TrVe61FuB1_8246: Length -- 513 bp   protein binding   other cellular components   other biological processes | <b>Description</b>    | JN606867       |
| <b>Molecule type</b> | nucleic acid                                                                                                 | <b>Molecule type</b>  | nucleic acid   |
| <b>Query Length</b>  | 716                                                                                                          | <b>Subject Length</b> | 2295           |
|                      |                                                                                                              | <b>Program</b>        | BLASTN 2.2.26+ |

**Graphic Summary**

**Distribution of 7 Blast Hits on the Query Sequence**

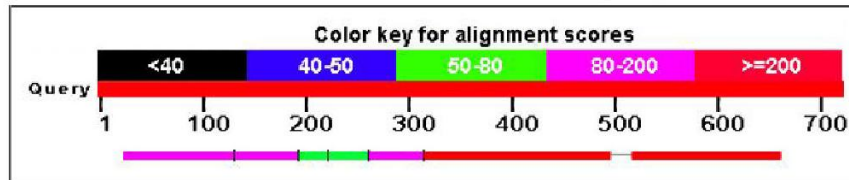

| <u>Accession</u> | <u>Description</u> | <u>Max score</u> | <u>Total score</u> | <u>Query coverage</u> | <u>E value</u> | <u>Max ident</u> | <u>Links</u> |
|------------------|--------------------|------------------|--------------------|-----------------------|----------------|------------------|--------------|
| 56677            | JN606867           | 335              | 1171               | 85%                   | 2e-05          | 100%             |              |

## Alignments

>lcl|56677 JN606867  
Length=2295

Sort alignments for this subject seq  
E value Scores Percent identity  
Query start position Subject start

Score = 335 bits (181), Expect = 2e-95  
Identities = 184/186 (99%), Gaps = 0/186 (0%)  
Strand=Plus/Minus

```
Query 308 CCTGCCAATGCTTCTTCTTACAAGTGCACCATCGCCCTCGGACTGGGACTTGGCCAAGAT 367
      |||
Sbjct 186 CCTGCCAATGCTTCTTCTTACAAGTGCACCATCGCCCTCGGACTGGGACTTGGCCAAGAT 127

Query 368 CTTCTGGCAACTAGTCTGGGCTGTGGAAACTGGACATGATGATATAACGTCGAGAAGA 427
      |||
Sbjct 126 CTTCTGGCAACTAATCTGGGCTGTGGAAACTGGACATGATGATATAACGTCGAGAAGA 67

Query 428 CGGGTTTTTTTATTATTGKGGGATTTGATGTTTTATGAGGAATGAAAGTTTAGTAGATACAGA 487
      |||
Sbjct 66 CGGGTTTTTTTATTATTGKGGGATTTGATGTTTTATGAGGAATGAAAGTTTAGTAGATACAGA 7

Query 488 GATCAT 493
      |||
Sbjct 6 GATCAT 1
```

Score = 265 bits (143), Expect = 2e-74  
Identities = 143/143 (100%), Gaps = 0/143 (0%)  
Strand=Plus/Plus

```
Query 514 CACGGTCCGTTTGTGATGAATACGCACGCTGAGATTGACAAAAAATGGAAGACTATTAC 573
      |||
Sbjct 1988 CACGGTCCGTTTGTGATGAATACGCACGCTGAGATTGACAAAAAATGGAAGACTATTAC 2047

Query 574 TATGGCAAGAATGGTTTCGAGCTGGCaaaaaaTGGAAATCTAAATGAGCTACATATAAG 633
      |||
Sbjct 2048 TATGGCAAGAATGGTTTCGAGCTGGCaaaaaaTGGAAATCTAAATGAGCTACATATAAG 2107

Query 634 CAACTGCTTAGGGCCCCAAAAGA 656
      |||
Sbjct 2108 CAACTGCTTAGGGCCCCAAAAGA 2130
```

Score = 196 bits (106), Expect = 9e-54  
Identities = 106/106 (100%), Gaps = 0/106 (0%)  
Strand=Plus/Minus

```
Query 25 TTTTGTCTTGGGAAGAGAGATTGATCCACAATTGAGACCAGTGTGAGTGCCTTCTCCGG 84
      |||
Sbjct 1511 TTTTGTCTTGGGAAGAGAGATTGATCCACAATTGAGACCAGTGTGAGTGCCTTCTCCGG 1452

Query 85 CGGGCATTTCTGAGTGAACAATACCTCTGCCGGCAGTCATCCACTG 130
      |||
Sbjct 1451 CGGGCATTTCTGAGTGAACAATACCTCTGCCGGCAGTCATCCACTG 1406
```

Score = 121 bits (65), Expect = 5e-31  
Identities = 65/65 (100%), Gaps = 0/65 (0%)  
Strand=Plus/Minus

```
Query 128 CTGCAGTCCACCAGCACCTATGGTGCCTTATGACCGGCAAAATCTTGATGTGTGACGCC 187
      |||
Sbjct 1136 CTGCAGTCCACCAGCACCTATGGTGCCTTATGACCGGCAAAATCTTGATGTGTGACGCC 1077

Query 188 TCCCT 192
      |||
Sbjct 1076 TCCCT 1072
```

Score = 115 bits (62), Expect = 3e-29  
Identities = 62/62 (100%), Gaps = 0/62 (0%)  
Strand=Plus/Minus

```
Query 251 AGGTGTAACAGCAAATTCATCTAGCAAGAGAAATGGATCTAGGGACTTCAACTCAGGCCT 310
      |||
Sbjct 412 AGGTGTAACAGCAAATTCATCTAGCAAGAGAAATGGATCTAGGGACTTCAACTCAGGCCT 353

Query 311 GC 312
      ||
Sbjct 352 GC 351
```

Score = 76.8 bits (41), Expect = 1e-17  
Identities = 41/41 (100%), Gaps = 0/41 (0%)  
Strand=Plus/Minus

```
Query 219 CCTCGGTGAGGATGGTCAGGAAATCCAGCAGGAGGTGTAAC 259
      |||
Sbjct 878 CCTCGGTGAGGATGGTCAGGAAATCCAGCAGGAGGTGTAAC 838
```

Score = 60.2 bits (32), Expect = 1e-12  
Identities = 32/32 (100%), Gaps = 0/32 (0%)  
Strand=Plus/Minus

```
Query 190 CCTGCAACATATATGTAAACAGTCTCAAAGCCT 221
      |||
Sbjct 993 CCTGCAACATATATGTAAACAGTCTCAAAGCCT 962
```
